# Supplementary material
Source: Springer Nature journal article supplement (https://www.springermedizin.de/resource/supplementary/12888_2010_727_MOESM1_ESM.pdf/9478334)

**T-1**

**Last year  
of T-2**

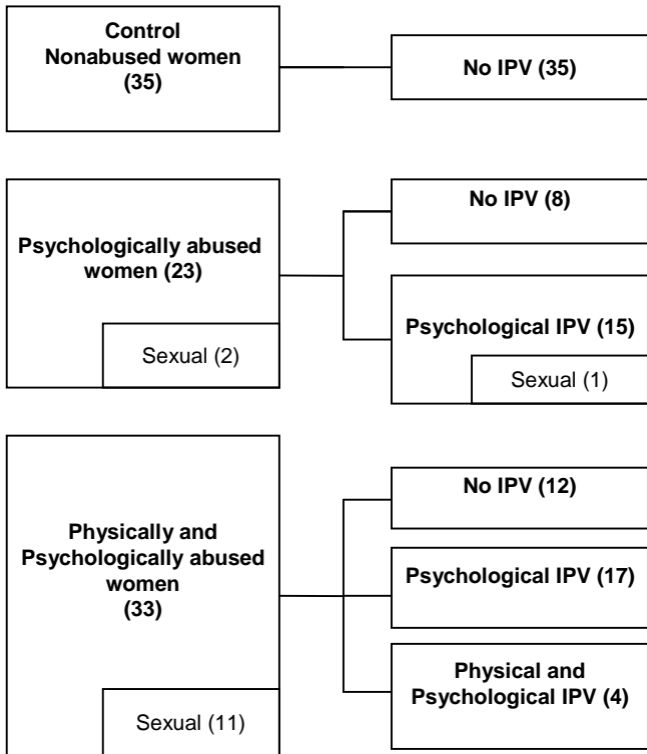

Supplement: MOESM1 [file 9478334]
